# Supplementary material for: Engineering and functional characterization of a proton-driven β-lactam antibiotic translocation module for bionanotechnological applications
Source: PubMed Central journal article supplement (PMC8390754; doi:10.1038/s41598-021-96298-4), 2021-08-26
Supplement: 41598_2021_96298_MOESM1_ESM.pdf [file 41598_2021_96298_MOESM1_ESM.pdf]

# Supplementary Information for:

## Engineering and functional characterization of a proton-driven $\beta$ -lactam antibiotic translocation module for bionanotechnological applications

Mirko Stauffer, Zöhre Ucurum, Daniel Harder & Dimitrios Fotiadis\*

Institute of Biochemistry and Molecular Medicine, University of Bern, 3012 Bern, Switzerland

\* Correspondence and requests for materials should be addressed to D.F. (email: [dimitrios.fotiadis@ibmm.unibe.ch](mailto:dimitrios.fotiadis@ibmm.unibe.ch))

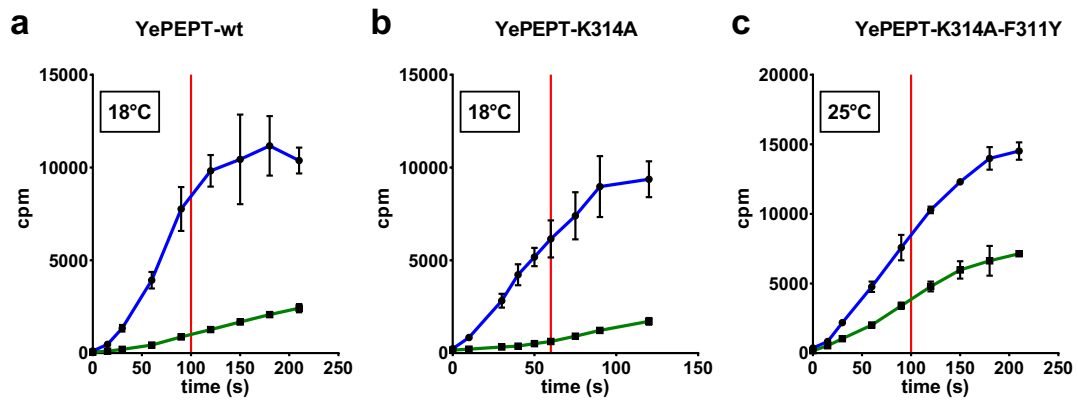

**Supplementary Fig. S1** Representative time course analysis of [<sup>3</sup>H]Ala-Ala uptake in *E. coli* cells transformed with different YePEPT variants (blue) or empty vector (green). Total signal of [<sup>3</sup>H]Ala-Ala uptake by (a) YePEPT<sup>WT</sup>, (b) YePEPT<sup>K314A</sup> and (c) YePEPT<sup>K314A-F311Y</sup> at different time points and the indicated temperatures. Data points represent counts per minute (cpm) ± SEM of at least triplicates. The selected duration for uptake experiments of each YePEPT variant are indicated by a red, vertical line.

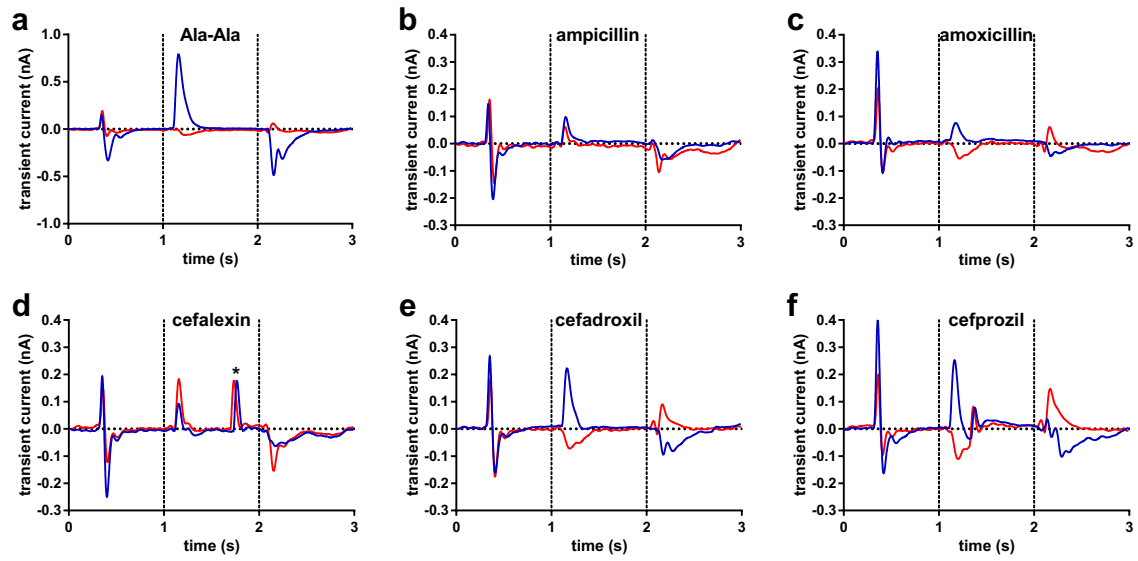

**Supplementary Fig. S2** Representative electrophysiology traces for **a** Ala-Ala, **b** ampicillin, **c** amoxicillin, **d** cefalexin, **e** cefadroxil and **f** cefprozil of proteoliposomes containing YePEPT<sup>K314A-F311Y</sup> (blue) or empty control liposomes (red). In **d** a second peak (\*) appeared consistently in all measurements, including when using control liposomes. Concentration of all compounds was 5 mM.

**Supplementary Table S1** Isoelectric points (pI) and net charges of compounds used in the SSM-based electrophysiology transport assay.

| Compound    | Isoelectric point (pI) | Net charge at pH = 6.7 |
|-------------|------------------------|------------------------|
| Ala-Ala     | 6.21                   | -0.02                  |
| Ampicillin  | 5.38                   | -0.23                  |
| Amoxicillin | 5.38                   | -0.23                  |
| Cefalexin   | 5.49                   | -0.23                  |
| Cefadroxil  | 5.48                   | -0.23                  |
| Cefprozil   | 5.52                   | -0.23                  |

All values were calculated using the Isoelectric Point plugin of the MarvinView software (ChemAxon Ltd.).
